# Supplementary material for: A flexible comb electrode triboelectric–electret nanogenerator with separated microfibers for a self-powered position, motion direction and acceleration tracking sensor
Source: Royal Society of Chemistry journal article supplement (doi:10.1039/c8ta04443k), 2018-01-01
Supplement: c8ta04443k1.pdf [file c8ta04443k1.pdf]

## Supporting Information

### **A flexible comb electrode triboelectric-electret nanogenerator with separated microfibers for self-powered position, motion direction and acceleration tracking sensor**

Jianxiong Zhu,<sup>ab\*</sup> Xiaoyu Guo,<sup>c</sup> Dehuan Meng,<sup>d</sup> Minkyu Cho,<sup>b</sup> Inkyu Park,<sup>b</sup> Run Huang,<sup>e\*</sup>

Weixing Song,<sup>f\*</sup>

<sup>a</sup>*Beijing Institute of Nanoenergy & Nanosystems, Chinese Academy of Sciences; National Center for Nanoscience and Technology (NCNST), Beijing 100083, P.R. China. E-mail: danverzhu@gmail.com*

<sup>b</sup>*School of Mechanical Engineering, Korea Advanced Institute of Science and Technology (KAIST), 291 Daehak-ro, Yuseong-gu, Daejeon 34141, Republic of Korea*

<sup>c</sup>*Department of Industrial and Manufacturing Systems Engineering, University of Missouri, Columbia, Missouri 65211, USA*

<sup>d</sup>*State Key Laboratory of Electronic Thin films and Integrated Devices, University of Electronic Science and Technology, Chengdu, 610054, P. R. China*

<sup>e</sup>*School of Materials Science and Engineering, Anhui University of Science & Technology, Huainan, 232001, P.R. China. E-mail: huang.run@stu.xjtu.edu.cn*

<sup>f</sup>*Department of Chemistry, Capital Normal University, Beijing 100048, P.R. China. E-mail: songwx@cnu.edu.cn*

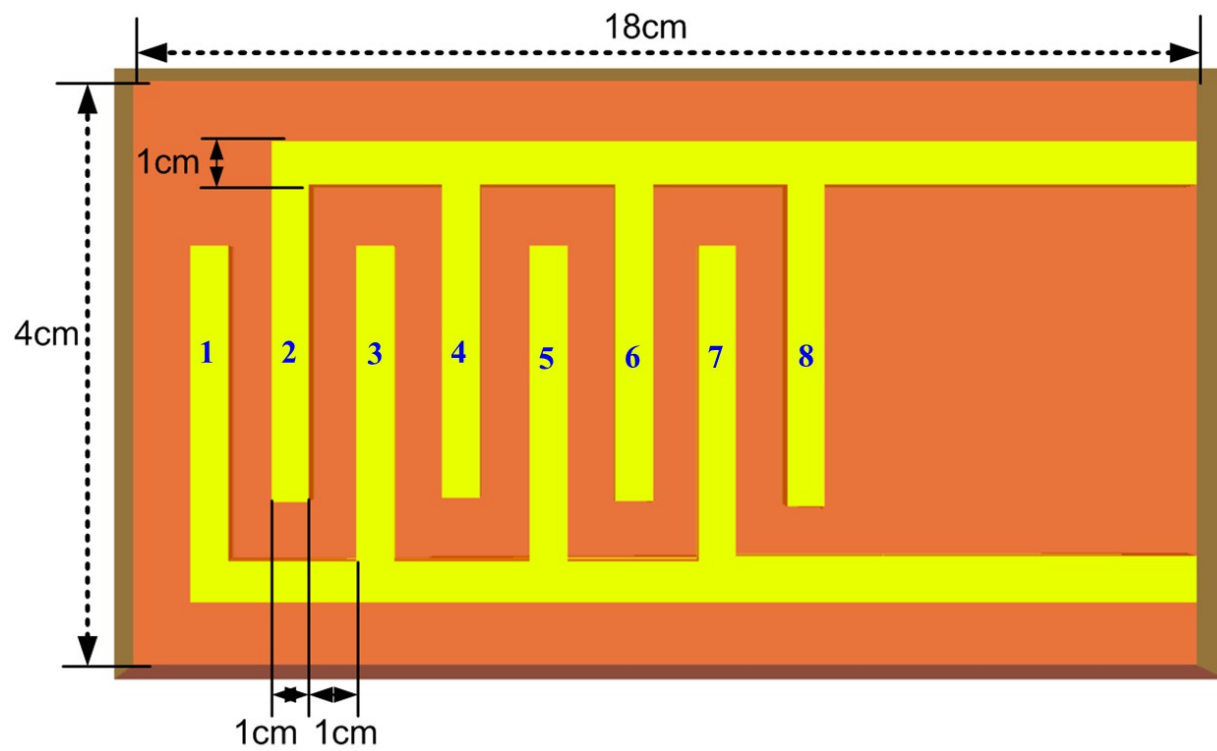

**Fig. S1** Dimensions of the triboelectric-electret nanogenerator film and its numbered locations.

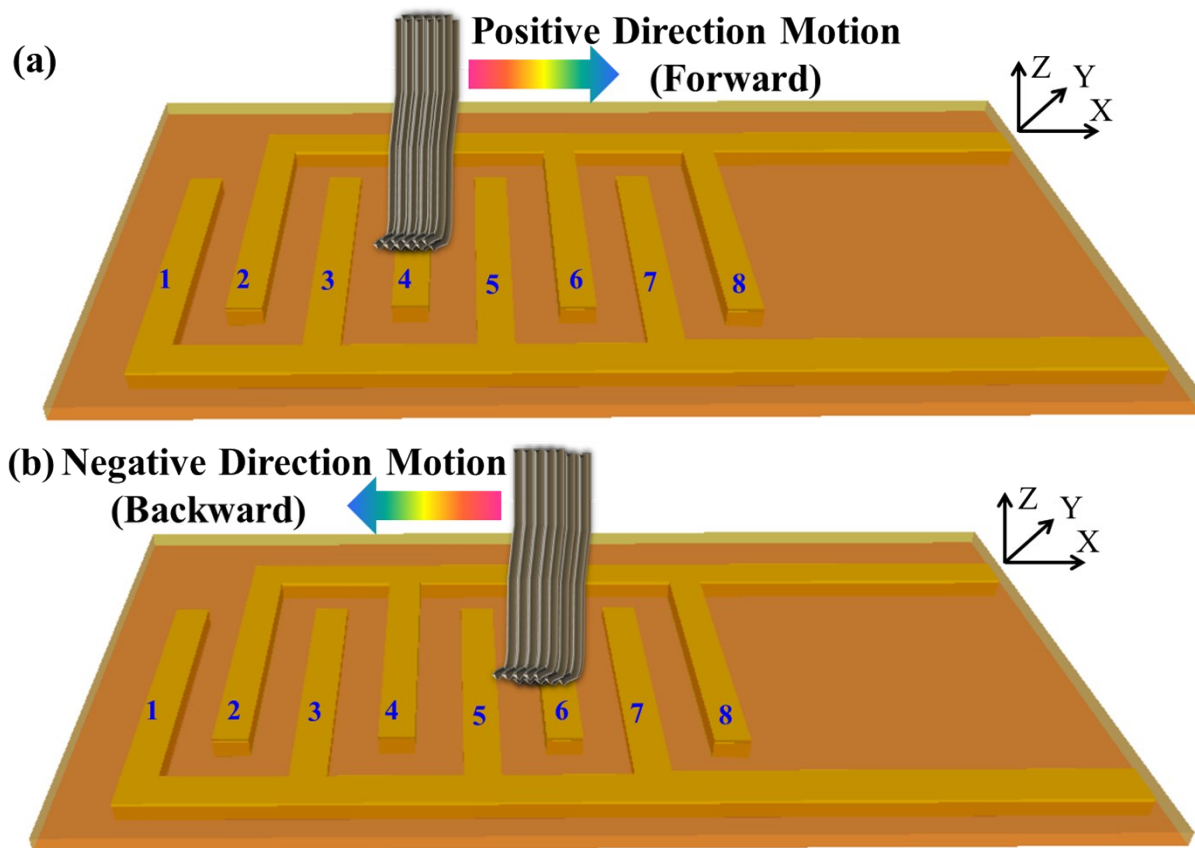

**Fig. S2** (a) Microfibers object with a positive X direction motion, and (b) Microfibers object with a negative X direction motion.

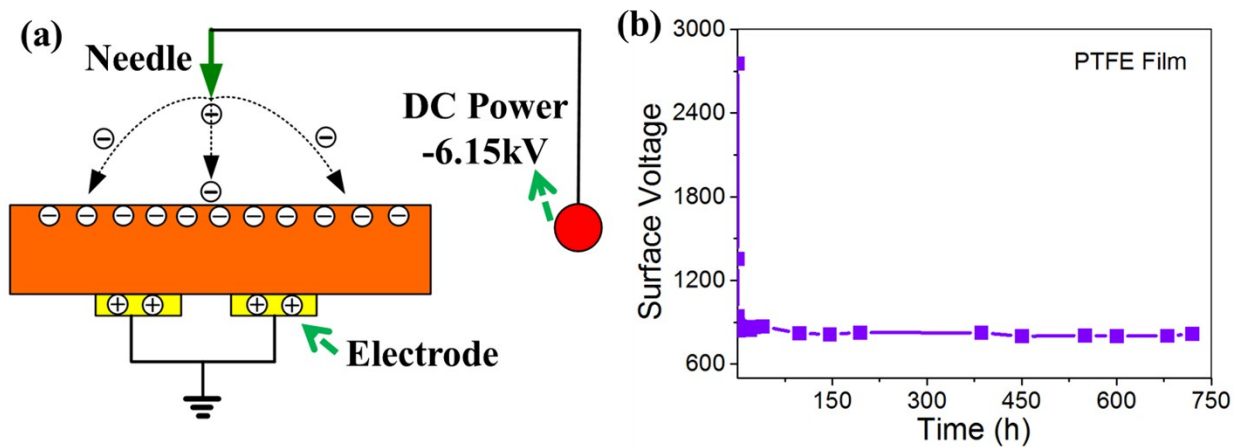

Fig. S3 (a) Corona charge platform, and (b) the surface voltage on the PTFE film with time.

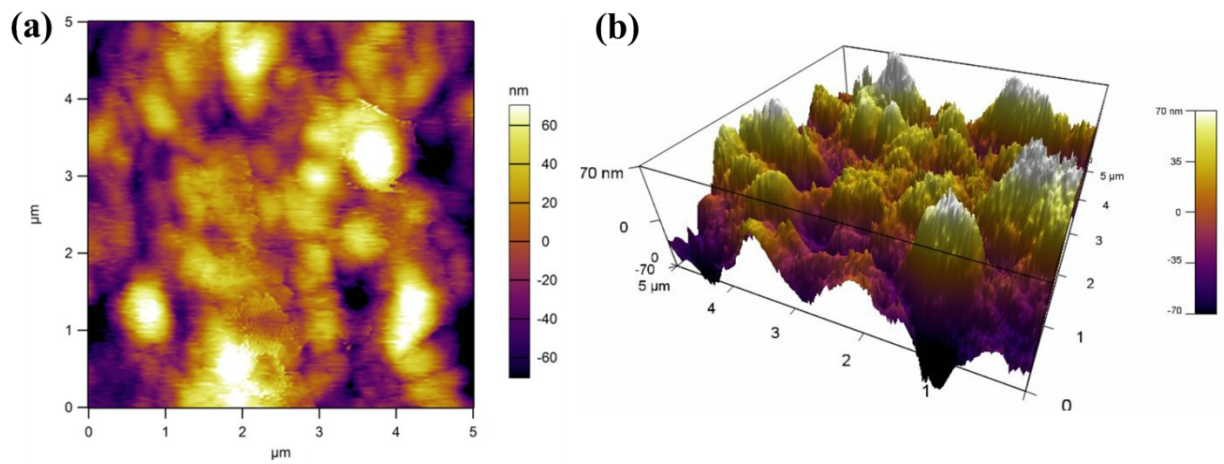

**Fig. S4** Characterization of material by AFM image analysis, (a) top view of PTFE film, (b) 3D view of PTFE film.

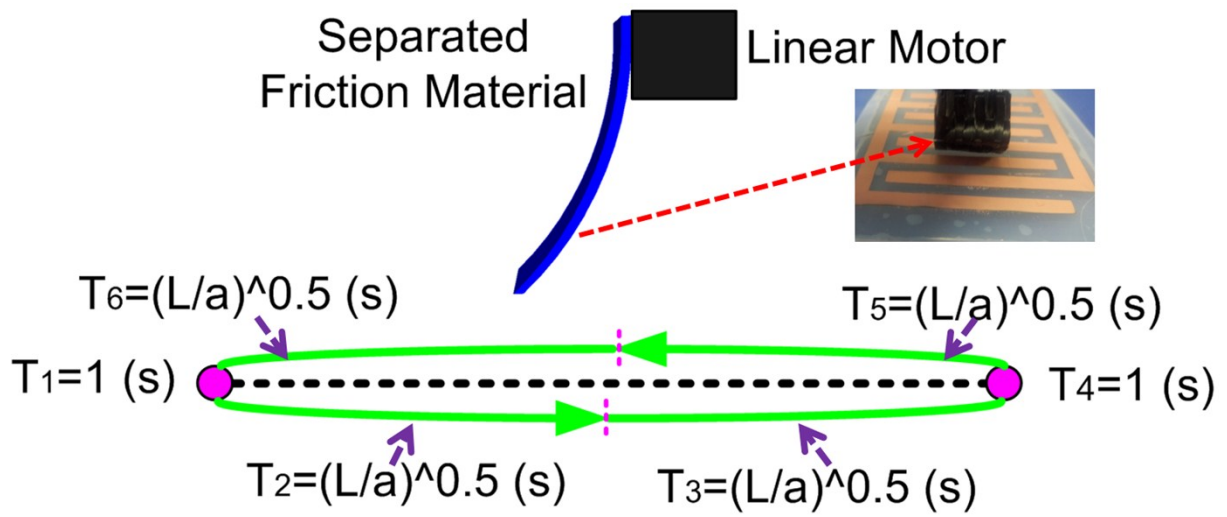

**Fig. S5** Operation status of the self-powered position and acceleration sensor in a linear motor measurement system, the separated object was moving to the left side.  $T_1$  and  $T_2$  were a 1s pause, the time  $T_2$ ,  $T_3$ ,  $T_5$ ,  $T_6$  were decided by the acceleration of the linear motor system.

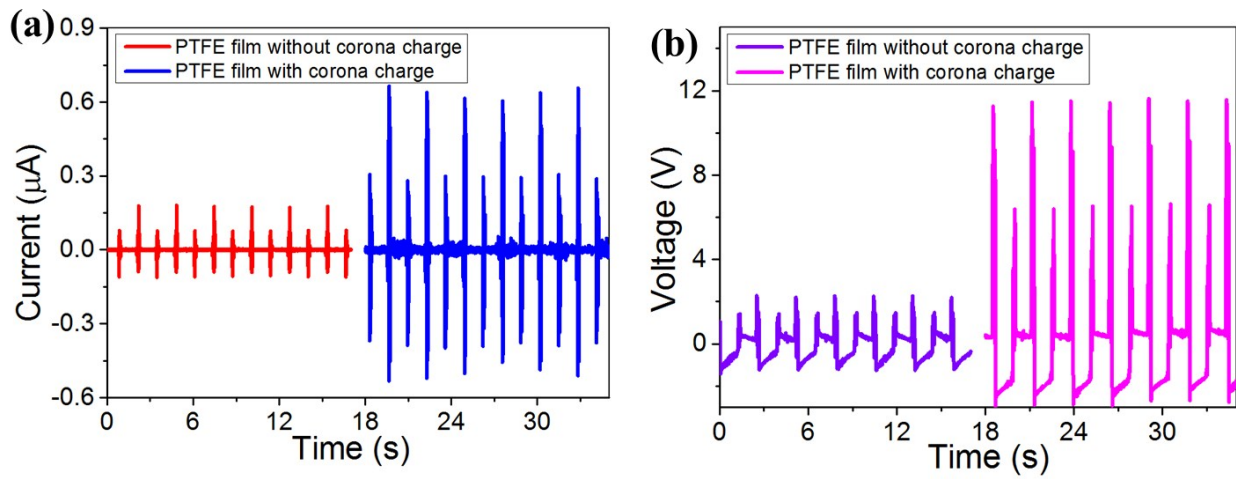

**Fig. S6** Measurement results without and with corona charge of the PTFE electret film in a flexible triboelectric-electret nanogenerator with the separated object, (a)  $I_{sc}$ , and (b)  $V_{oc}$ .

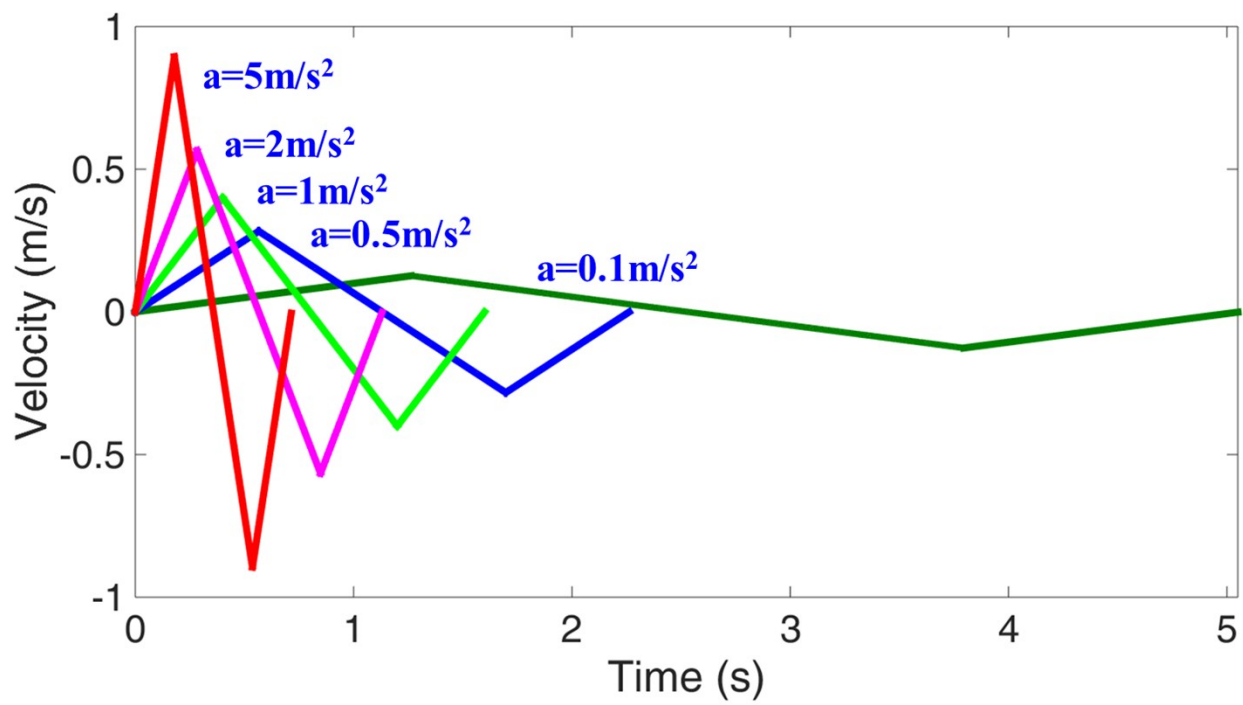

Fig. S7 Velocity in respect to the time at different accelerations.



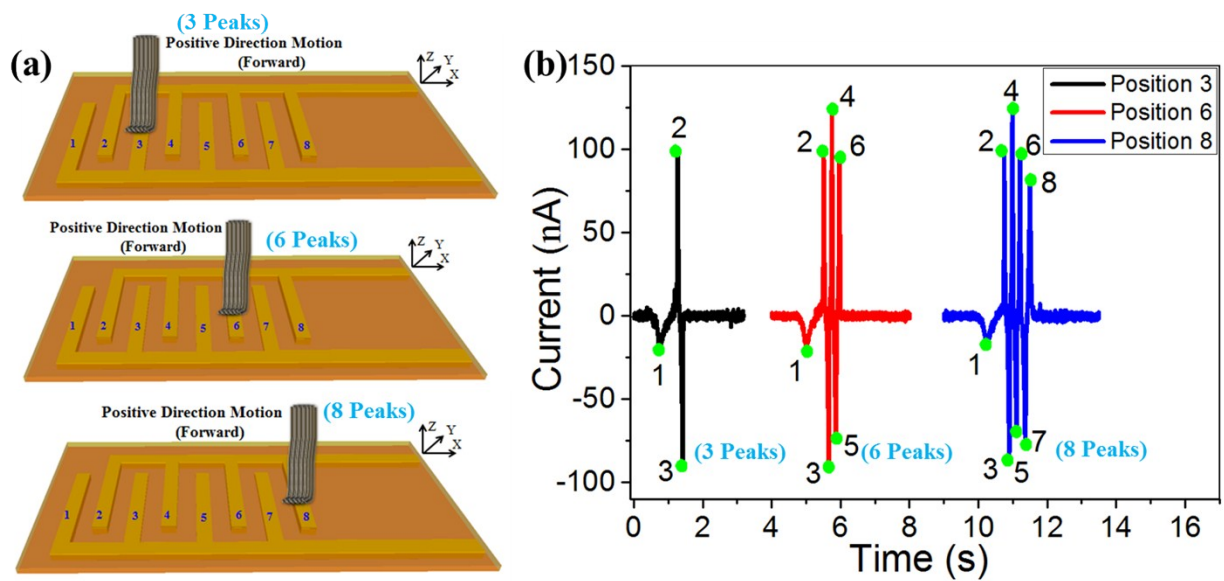

**Fig. S8** (a) Schematic of the positions on flexible triboelectric-electret nanogenerator film, and (e) positions were identified by the number of peaks [48], ‘position 3’, ‘position 6’ and ‘position 8’.

**Table S1.** Comparison output voltage and short-current in an acceleration range of our work with the current state-of-the-art

| Items          | Goal                               | Theory                 | Characteristic                        | Acceleration or speed Range            | Output-voltage and short-current                    |
|----------------|------------------------------------|------------------------|---------------------------------------|----------------------------------------|-----------------------------------------------------|
| Reference [32] | Moving Object Tracking Sensor      | Triboelectric          | Single electrode and Al Ball          | 0-0.6m/s <sup>2</sup>                  | 50nA short-current with Maximum 0.6m/s <sup>2</sup> |
| Reference [33] | Motion Tracking sensor             | Triboelectric          | Single electrode and PDMS Block       | Not mentioned                          | Maximum 4V Open-circuit voltage                     |
| Reference [34] | Velocity and Trajectory Tracking   | Triboelectric          | Single electrode and PTFE Block       | 2.8cm/s-22.5m/s                        | 6nA short-current                                   |
| Reference [35] | Motion Tracking                    | Triboelectric          | Single electrode and Al Ball          | 0.3m/s-1.5m/s                          | 0.1μA short-current                                 |
| Our work       | Position and Acceleration Tracking | Triboelectric-Electret | Comb Electrode and Carbon Microfibers | 0.1m/s <sup>2</sup> -5m/s <sup>2</sup> | 0.6μA short-current 12V Open-circuit voltage        |

- 32 F. Yi, L. Lin, S. M. Niu, J. Yang, W. Z. Wu, S. H. Wang, Q. L. Liao, Y. Zhang and Z. L. Wang, *Adv. Funct. Mater.*, 2014, **24**, 7488–7494.
- 33 C. B. Han, C. Zhang, X. H. Li, L. Zhang, T. Zhou, W. G. Hu and Z. L. Wang, *Nano Energy*, 2014, **9**, 325–333.
- 34 Y. J. Su, G. Zhu, W. Q. Yang, J. Yang, J. Chen, Q. S. Jing, Z. M. Wu, Y. D. Jiang and Z. L. Wang, *ACS Nano*, 2014, **8**, 3843-3850.
- 35 J. K. Chen, P. Ding, R. Z. Pan, W. P. Xuan, D. P. Guo, Z. Ye, W. L. Yin, H. Jin, X. Z. Wang, S. Dong and J. K. Luo, *Nano Energy*, 2017, **34**, 442–448.

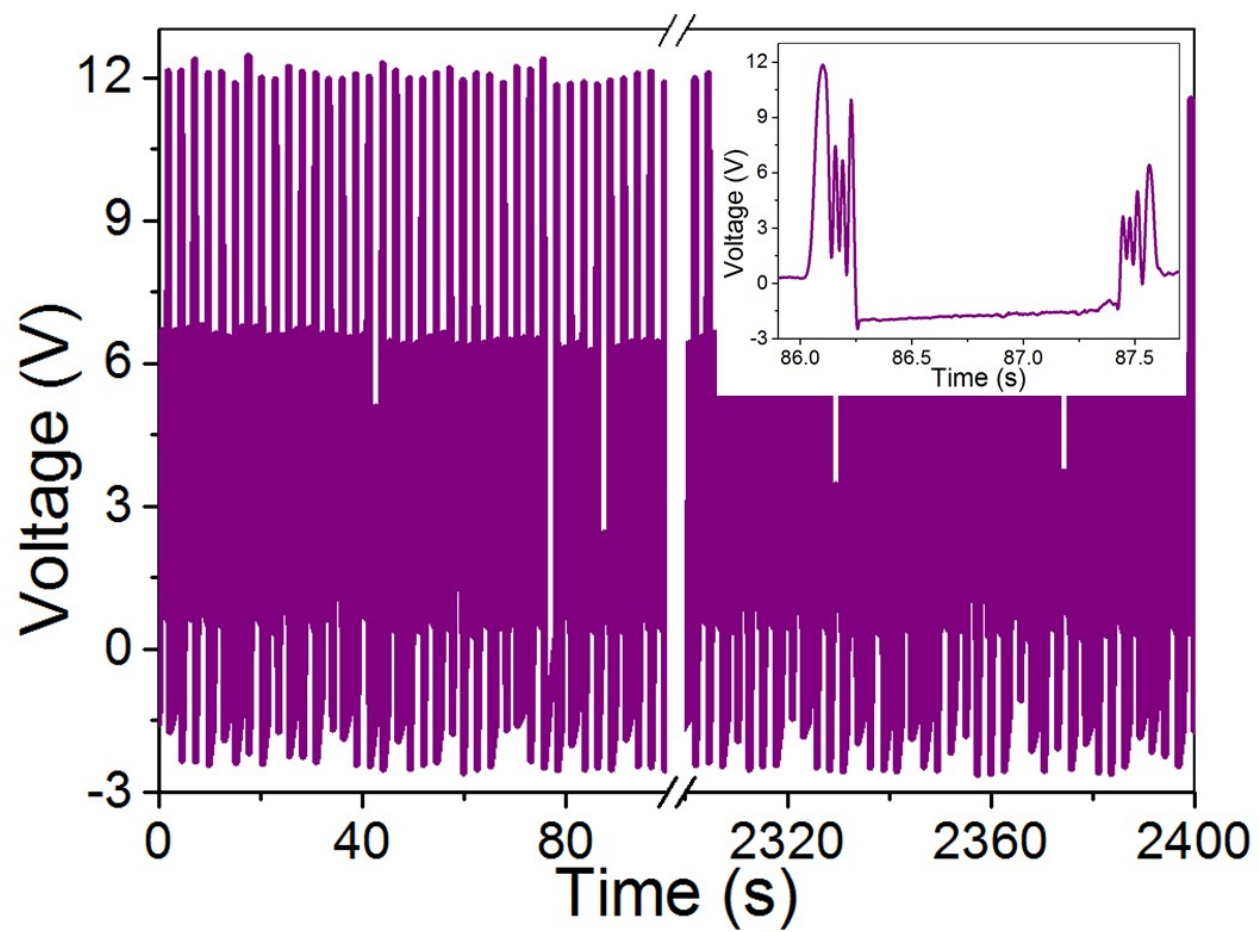

Fig. S9  $V_{oc}$  measured for more than 2400 seconds (~1000 cycles).

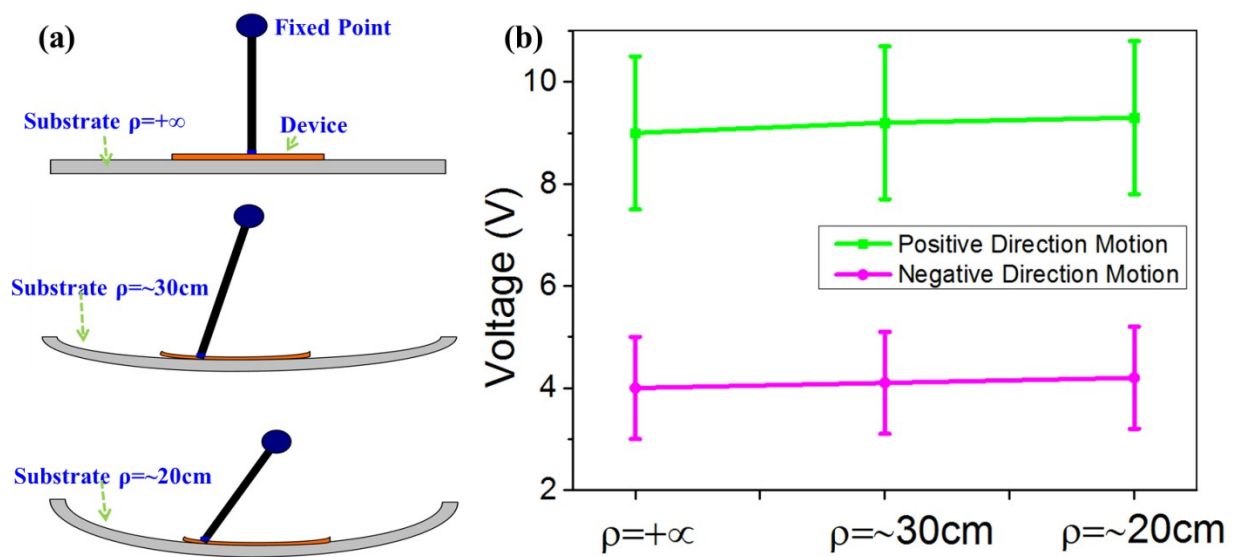

**Fig. S10** (a) Flexible demonstration using three different bending states to the flexible triboelectric-electret nanogenerator, and (b) the measured voltage out from the device.

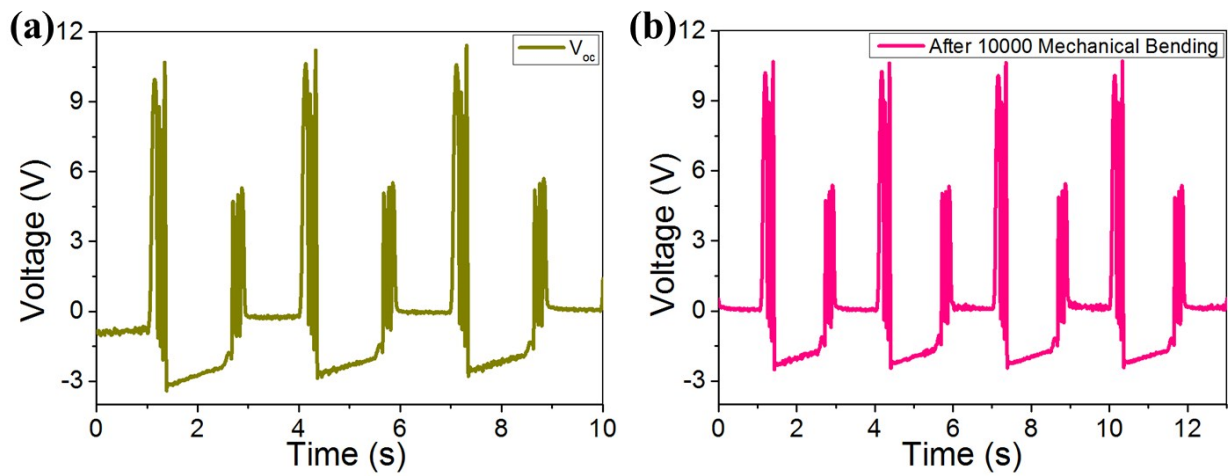

**Fig. S11**  $V_{oc}$  measured of the flexible triboelectric-electret nanogenerator and its test after 10000 mechanical bending.

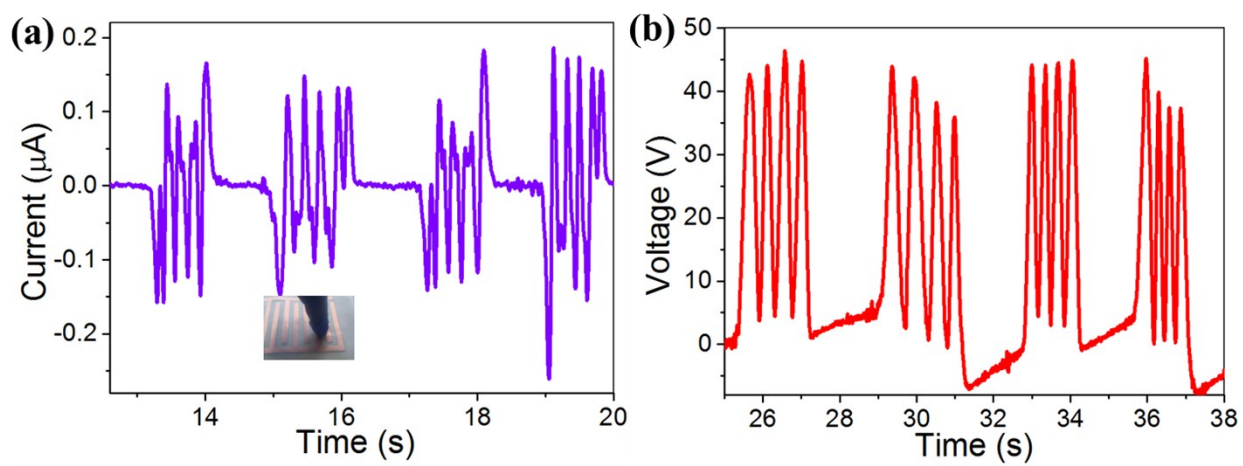

**Fig. S12** Finger wearing with glove for sliding application, (a)  $I_{sc}$  with a finger sliding and (b)  $V_{oc}$  with a finger sliding.

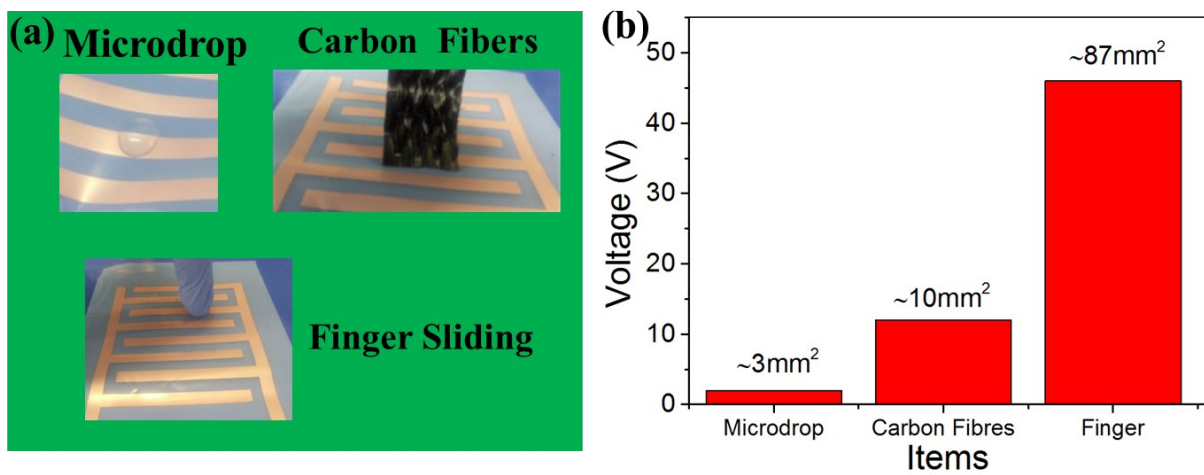

**Fig. S13** Separated triboelectric materials objects for comparison, (a) three triboelectric status, and (b)  $V_{oc}$  from the mentioned status.

**Video S1.** Flexibility demonstration of a triboelectric-electret nanogenerator film.
